# Supplementary material for: A highly efficient dye-sensitized solar cell with a platinum nanoflowers counter electrode
Source: Royal Society of Chemistry journal article supplement (doi:10.1039/c2jm14623a), 2012-01-01
Supplement: c2jm14623a.pdf [file c2jm14623a.pdf]

# Supporting information

## Highly efficient dye-sensitized solar cell with a platinum nanoflowers counter electrode

Tien-Lin Hsieh,<sup>a</sup> Hsin-Wei Chen,<sup>a</sup> Chung-Wei Kung,<sup>a</sup> Chun-Chieh Wang,<sup>a</sup> R. Vittal,<sup>a</sup>  
and Kuo-Chuan Ho<sup>\*a,b</sup>

<sup>a</sup>*Department of Chemical Engineering, National Taiwan University, Taipei 10617, Taiwan;*

<sup>b</sup>*Institute of Polymer Science and Engineering, National Taiwan University, Taipei 10617, Taiwan*

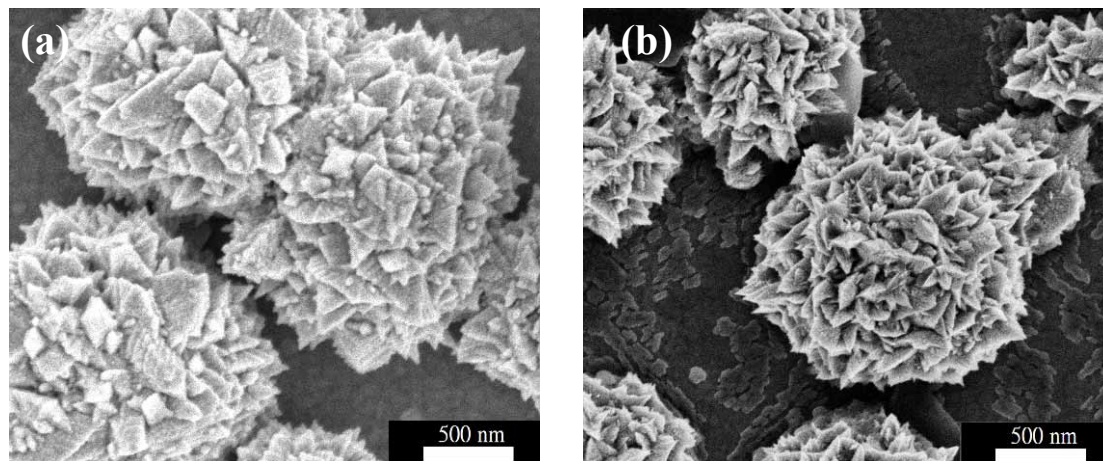

**Figure S1.** SEM images of the PtNFs films deposited with the cathodic polarization times of (a) 4 s; (b) 10 s.
